# Supplementary material for: In Silico Study Probes Potential Inhibitors of Human Dihydrofolate Reductase for Cancer Therapeutics
Source: PubMed Central journal article supplement (PMC6406960; doi:10.3390/jcm8020233), 2019-02-11
Supplement: jcm-08-00233-s001.pdf [file jcm-08-00233-s001.pdf]

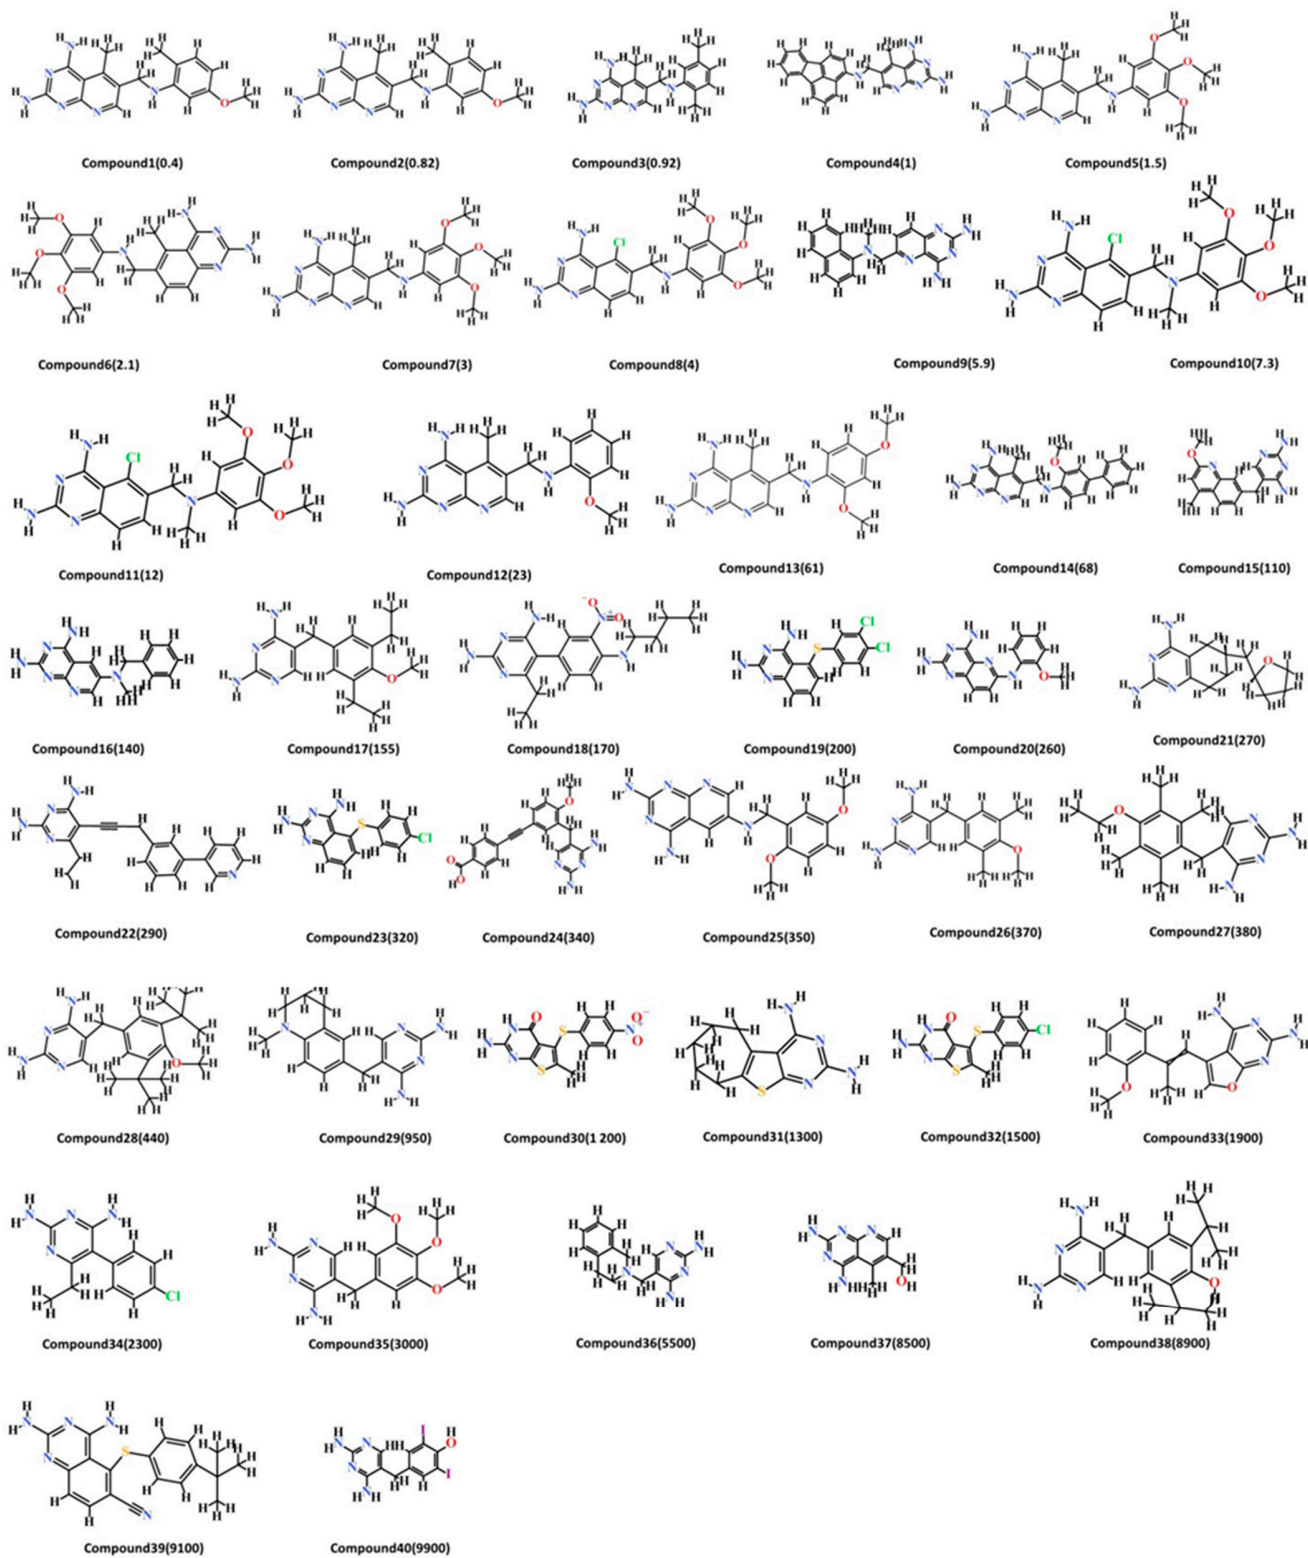

Figure S1. Test set compounds.

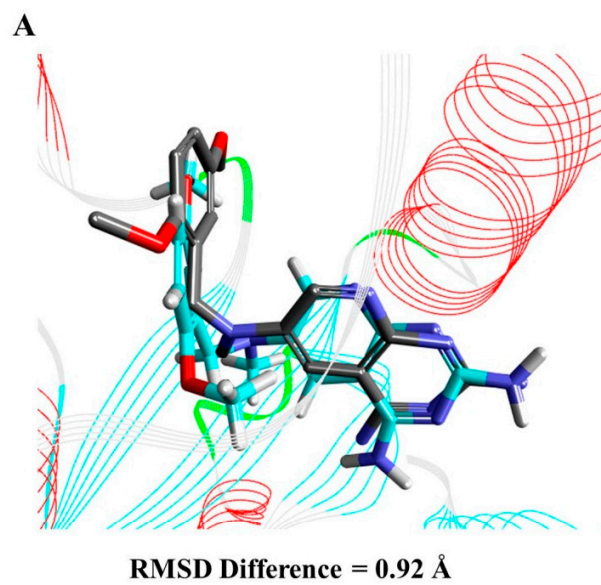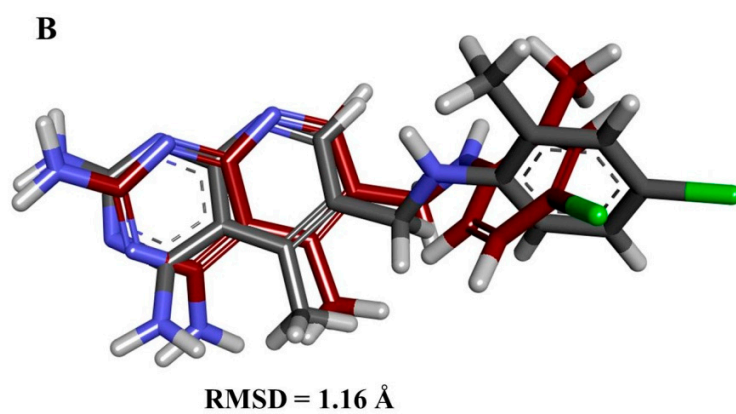

Figure S2. Optimization of docking protocol.

Table S1. Experimental and predicted activity of test set compounds based on hyp01.

| Compound No. | Fit value | Exp IC <sub>50</sub> (nmol/L) | Pred IC <sub>50</sub> (nmol/L) | Error | Experimental Scale | Predicted Scale |
|--------------|-----------|-------------------------------|--------------------------------|-------|--------------------|-----------------|
| 1            | 7.1       | 0.4                           | 2.4                            | 6     | +++                | +++             |
| 2            | 6.69      | 0.82                          | 6.2                            | 7.5   | +++                | +++             |
| 3            | 6.99      | 0.92                          | 3.1                            | 3.3   | +++                | +++             |
| 4            | 6.79      | 1                             | 4.9                            | 4.9   | +++                | +++             |
| 5            | 6.63      | 1.5                           | 7                              | 4.7   | +++                | +++             |
| 6            | 6.41      | 2.1                           | 12                             | 5.5   | +++                | +++             |
| 7            | 5.62      | 3                             | 72                             | 24    | +++                | +++             |
| 8            | 6.47      | 4                             | 10                             | 2.5   | +++                | +++             |
| 9            | 6.12      | 5.9                           | 22                             | 3.8   | +++                | +++             |
| 10           | 6.76      | 7.3                           | 5.2                            | -1.4  | +++                | +++             |
| 11           | 6.18      | 12                            | 20                             | 1.6   | +++                | +++             |
| 12           | 6.38      | 23                            | 12                             | -1.9  | +++                | +++             |
| 13           | 5.91      | 61                            | 37                             | -1.7  | +++                | +++             |
| 14           | 5.63      | 68                            | 71                             | 1     | +++                | +++             |
| 15           | 5         | 110                           | 300                            | 2.7   | ++                 | ++              |
| 16           | 5.3       | 140                           | 150                            | 1.1   | ++                 | ++              |
| 17           | 4.85      | 155                           | 420                            | 2.7   | ++                 | ++              |
| 18           | 4.92      | 170                           | 360                            | 2.1   | ++                 | ++              |
| 19           | 4.96      | 200                           | 330                            | 1.6   | ++                 | ++              |
| 20           | 4.63      | 260                           | 700                            | 2.7   | ++                 | +               |
| 21           | 4.67      | 270                           | 630                            | 2.4   | ++                 | +               |
| 22           | 4.98      | 290                           | 320                            | 1.1   | ++                 | ++              |
| 23           | 5.01      | 320                           | 290                            | -1.1  | ++                 | ++              |
| 24           | 5.02      | 340                           | 290                            | -1.2  | ++                 | ++              |
| 25           | 4.57      | 370                           | 800                            | 2.2   | ++                 | +               |
| 26           | 5.07      | 380                           | 250                            | -1.5  | ++                 | ++              |
| 27           | 5.03      | 440                           | 280                            | -1.6  | ++                 | ++              |
| 28           | 3.93      | 950                           | 3500                           | 3.7   | ++                 | +               |
| 29           | 4.09      | 1200                          | 2400                           | 2     | +                  | +               |
| 30           | 3.6       | 1300                          | 7400                           | 5.7   | +                  | +               |
| 31           | 4.56      | 1500                          | 820                            | -1.8  | +                  | +               |
| 32           | 4.48      | 1900                          | 990                            | -1.9  | +                  | +               |
| 33           | 3.62      | 2300                          | 7100                           | 3.1   | +                  | +               |
| 34           | 4.3       | 3000                          | 1500                           | -2    | +                  | +               |
| 35           | 4.45      | 5500                          | 1100                           | -5.2  | +                  | +               |
| 36           | 3.63      | 7800                          | 7000                           | -1.1  | +                  | +               |
| 37           | 3.62      | 8500                          | 7200                           | -1.2  | +                  | +               |
| 38           | 4.51      | 8900                          | 920                            | -9.7  | +                  | +               |
| 39           | 4.27      | 9100                          | 1600                           | -5.7  | +                  | +               |
| 40           | 4.36      | 9900                          | 1300                           | -7.5  | +                  | +               |
